# Supplementary material for: Intraspecific Pollen Morphology Variation and Its Responses to Environmental Factors of Wild Cathaya argyrophylla Chun Et Kuang Endemic to China
Source: MDPI journal article supplement (doi:10.3390/f13050651), 2022-04-22
Supplement: s1 [file s1]

**Table S1.** Geographical location of studied *Cathaya argyrophylla* genotypes

| <b>ID</b> | <b>Sample Number</b> | <b>Location</b>                          | <b>population</b> | <b>Longitude E</b> | <b>Latitude N</b> |
|-----------|----------------------|------------------------------------------|-------------------|--------------------|-------------------|
| 1         | MPGY1-1              | Shajiaodong Natural Reserve, Mapigu      | SJD-M             | 110.584708         | 26.538476         |
| 2         | MPGY1-2              | Shajiaodong Natural Reserve, Mapigu      | SJD-M             | 110.584783         | 26.538365         |
| 3         | MPGY1-3              | Shajiaodong Natural Reserve, Mapigu      | SJD-M             | 110.584825         | 26.538234         |
| 4         | MPGY1-5              | Shajiaodong Natural Reserve, Mapigu      | SJD-M             | 110.584852         | 26.538137         |
| 5         | MPGY1-9              | Shajiaodong Natural Reserve, Mapigu      | SJD-M             | 110.584913         | 26.537823         |
| 6         | LYGY2-1              | Shajiaodong Natural Reserve, Luanyangang | SJD-L             | 110.585062         | 26.534299         |
| 7         | LYGY2-2              | Shajiaodong Natural Reserve, Luanyangang | SJD-L             | 110.585077         | 26.534322         |
| 8         | LYGY2-3              | Shajiaodong Natural Reserve, Luanyangang | SJD-L             | 110.585127         | 26.534428         |
| 9         | LYGY2-5              | Shajiaodong Natural Reserve, Luanyangang | SJD-L             | 110.585171         | 26.534449         |
| 10        | LYGY2-6              | Shajiaodong Natural Reserve, Luanyangang | SJD-L             | 110.585123         | 26.53448          |
| 11        | LYGY2-7              | Shajiaodong Natural Reserve, Luanyangang | SJD-L             | 110.585151         | 26.534501         |
| 12        | LYGY2-11             | Shajiaodong Natural Reserve, Luanyangang | SJD-L             | 110.585074         | 26.534746         |
| 13        | LYGY2-12             | Shajiaodong Natural Reserve, Luanyangang | SJD-L             | 110.585021         | 26.534861         |

|    |          |                                          |       |            |           |
|----|----------|------------------------------------------|-------|------------|-----------|
| 14 | LYGY2-13 | Shajiaodong Natural Reserve, Luanyangang | SJD-L | 110.585021 | 26.534861 |
| 15 | SMPY3-10 | Bamianshan Natural Reserve, Simaoping    | BMS-S | 113.721697 | 26.066057 |
| 16 | SMPY3-28 | Bamianshan Natural Reserve, Simaoping    | BMS-S | 113.721125 | 26.064829 |
| 17 | JPLY4-2  | Bamianshan Natural Reserve, Jiaopenliao  | BMS-J | 113.720951 | 26.053457 |
| 18 | JPLY4-3  | Bamianshan Natural Reserve, Jiaopenliao  | BMS-J | 113.720843 | 26.053402 |
| 19 | JPLY4-5  | Bamianshan Natural Reserve, Jiaopenliao  | BMS-J | 113.720838 | 26.053342 |
| 20 | JPLY4-24 | Bamianshan Natural Reserve, Jiaopenliao  | BMS-J | 113.720433 | 26.052845 |
| 21 | JPLY4-25 | Bamianshan Natural Reserve, Jiaopenliao  | BMS-J | 113.720564 | 26.052855 |
| 22 | JPLY4-26 | Bamianshan Natural Reserve, Jiaopenliao  | BMS-J | 113.721014 | 26.052832 |
| 23 | JPLY4-27 | Bamianshan Natural Reserve, Jiaopenliao  | BMS-J | 113.721051 | 26.052425 |

---
